# Supplementary material for: Purification and Characterization of Double-Stranded Nucleic Acid-Dependent ATPase Activities of Tagged Dicer-Related Helicase 1 and its Short Isoform in Caenorhabditis elegans
Source: PubMed Central journal article supplement (PMC7397212; doi:10.3390/genes11070734), 2020-07-01
Supplement: genes-11-00734-s001.pdf [file genes-11-00734-s001.pdf]

Supplementary Materials

*Article*

**Purification and characterization of double-stranded nucleic acid-dependent ATPase activities of tagged Dicer-related helicase 1 and its short isoform in *Caenorhabditis elegans***

**Taishi Kobayashi, Takuro Murakami, Yuu Hirose and Toshihiko Eki\***

Molecular Genetics Laboratory, Department of Applied Chemistry and Life Science, Toyohashi University of Technology, Toyohashi, Aichi 441-8580, Japan ; kobatai0122@gmail.com (T. Kobayashi); murakami.takuro.eo@tut.jp (T. Murakami); hirose@chem.tut.ac.jp (Y. Hirose); eki@chem.tut.ac.jp (T. Eki)

\*Correspondence: eki@chem.tut.ac.jp; Tel.: +81-532-44-6907 (T.E.)



|           |      |                                                                      |     |                                |                         |                                                         |                                          |     |
|-----------|------|----------------------------------------------------------------------|-----|--------------------------------|-------------------------|---------------------------------------------------------|------------------------------------------|-----|
| Ce_DRH-1a | 1    | MRRKQCSLSLYDKETLLCLEPTYRDEKQDGFSELLPLGRDELKIOSEN                     | --- | QDFSKQLYHDLKNSLSNA             | DDRERYKDIIMTYLQYLPKCTFH | 95                                                      |                                          |     |
| Cbr_DRH-1 | 1    | WRKKQCAALVLYREIIRCLPTIEPEPDRGHEFEELLTRGRIEELIGESEN                   | --- | EMDFKLLFVELTSSPLSLA            | DDRERYKDIIMTYLQYLPKCTFH | 96                                                      |                                          |     |
| Cla_DRH-1 | 1    | WRKKQCAALVLYREIIRCLPTIEPEPDRGHEFEELLTRGRIEELIGESEN                   | --- | AVDFSKLLFVELSESPLTRD           | DEERLYKNIIMTYLQYLPKCTFH | 97                                                      |                                          |     |
| Cre_DRH-1 | 1    | WRKKQCAALVLYREIIRCLPTIEPEPDRGHEFEELLTRGRIEELIGESEN                   | --- | AVDFSKLLFVELSESPLTRD           | DEERLYKNIIMTYLQYLPKCTFH | 96                                                      |                                          |     |
| Cbg_DRH-1 | 1    | WRKKQCAALVLYREIIRCLPTIEPEPDRGHEFEELLTRGRIEELIGESEN                   | --- | TTSFSSQLFHELDESPTSKA           | DDRERYKNIIMTYLQYLPKCTFH | 96                                                      |                                          |     |
| Cni_DRH-1 | 1    | WRKKQCAALVLYREIIRCLPTIEPEPDRGHEFEELLTRGRIEELIGESEN                   | --- | PPNKKGSSQLFHELDESPTSKA         | DDRERYKNIIMTYLQYLPKCTFH | 99                                                      |                                          |     |
| Ce_DRH-1a | 96   | KLLNCSREVKLSDFHYLDFHFGFLRFIEPKVLAFLDSYFQYDVAVALR                     | --- | KEIER                          | ---                     | NEEDNQSDFTKLLILRIVPLLGEDAVYDMMYIETSEKS                  | 190                                      |     |
| Cbr_DRH-1 | 97   | RIVSCSDKSIIRSEFCIKLRNLDNFRFLNPALGLGSPYPHYEDLVRVFNWRNTE               | --- | ---                            | ---                     | NEEDNQENMKKAILKMWPLGFEFAYDMMYIETSEHT                    | 192                                      |     |
| Cla_DRH-1 | 98   | KLLKCSDKIMRRQDFSTILNLDGFLRYSDEPTEILRYLDCYPHYKQVVALR                  | --- | REIED                          | ---                     | NRDDETEDEDFIKLLILRIVPLLGESSAYDMMYIETSENT                | 193                                      |     |
| Cre_DRH-1 | 97   | KLLKCSDRTMRSQDFSTILNLDGFLRYSDEPTEILRYLDCYPHYDVMVALR                  | --- | REIED                          | ---                     | NRDDETEDEDFIKLLILRIVPLLGESSAYDMMYIETSENT                | 192                                      |     |
| Cbg_DRH-1 | 97   | KLLKCSDRTMRCQDFGLLNLDGFLINYPDPNEVLYLDSYFQYDILVREL                    | --- | RETERIVPE                      | ---                     | EQQNTFELKKSILRIVPLLGESSAYDMMYALYDKP                     | 193                                      |     |
| Cni_DRH-1 | 100  | KLLKCSDRTMRCQDFGLLNLDGFLINYPDPNEVLYLDSYFQYDILVREL                    | --- | RETERIMEOE                     | ---                     | EQQNTFELKKSILRIVPLLGESSAYDMMYALYNNP                     | 196                                      |     |
| Ce_DRH-1a | 191  | SNLNDVEAKDFIAKVLRLKNDGLREFY                                          | --- | QITNARROLNKRLYICPV             | HESEATEM                | ---                                                     | YLGTAALNTRMYRMINIRYDNTIYQENSTIPRLVIESVRR | 284 |
| Cbr_DRH-1 | 193  | TNDRQEKAFSIEDLLHLEGEFRRYGIFHFSOSINADRLDRNGMYICPTHESEATEM             | --- | YIGSPFN                        | ---                     | TRMYRMINIRYDNTIYQENSTIPRLVIESVRR                        | 292                                      |     |
| Cla_DRH-1 | 194  | SNLNEEAKFTIENVLDLKRGGFKAFY                                           | --- | EFISADRRQCNKRLYICPTHESEATEM    | ---                     | VRLPEFNDSRYRMINIRYDNTIYQENSTIPRLVIESVRR                 | 285                                      |     |
| Cre_DRH-1 | 193  | SNLNEEAKFTIENVLDLKRGGFKAFY                                           | --- | EFISADRRQCNKRLYICPTHESEATEM    | ---                     | VRLPEFNDSRYRMINIRYDNTIYQENSTIPRLVIESVRR                 | 284                                      |     |
| Cbg_DRH-1 | 194  | SNLNEEARAFIEKILRLRPGSDFAFY                                           | --- | REVSDDRFRNGNITICPIHEATEM       | ---                     | ITARTPEVNRHYRMINIRYDNTIYQENSTIPRLVIESVRR                | 285                                      |     |
| Cni_DRH-1 | 197  | SNLNEEARAFIEKILRLRPGSDFAFY                                           | --- | REVSDDRFRNGNITICPIHEATEM       | ---                     | ITARTPAVNRHYRMINIRYDNTIYQENSTIPRLVIESVRR                | 288                                      |     |
| Ce_DRH-1a | 285  | THDRQLCLRRYQEEELCVLALRGNTIVTAPTSGKTVIAANIKE                          | --- | HFESRSSEK                      | ---                     | RFKALFMTNPSMILKQQSDSISSYLDMY                            | 369                                      |     |
| Cbr_DRH-1 | 293  | TDQORQLCLRRYQEEELCVLALRGNTIVTAPTSGKTVIAANIKE                         | --- | HFETREDR                       | ---                     | QRFKALFMTNPSMILKQQSDSISSYLDMY                           | 392                                      |     |
| Cla_DRH-1 | 286  | THDRQLCLRRYQEEELCVLALRGNTIVTAPTSGKTVIAANIKE                          | --- | HFETREDR                       | ---                     | QRFKALFMTNPSMILKQQSDSISSYLDMY                           | 370                                      |     |
| Cre_DRH-1 | 285  | THDRQLCLRRYQEEELCVLALRGNTIVTAPTSGKTVIAANIKE                          | --- | HFETREDR                       | ---                     | QRFKALFMTNPSMILKQQSDSISSYLDMY                           | 369                                      |     |
| Cbg_DRH-1 | 286  | THDRQLCLRRYQEEELCVLALRGNTIVTAPTSGKTVIAANIKE                          | --- | HFETREDR                       | ---                     | QRFKALFMTNPSMILKQQSDSISSYLDMY                           | 370                                      |     |
| Cni_DRH-1 | 289  | THDRQLCLRRYQEEELCVLALRGNTIVTAPTSGKTVIAANIKE                          | --- | HFETREDR                       | ---                     | QRFKALFMTNPSMILKQQSDSISSYLDMY                           | 373                                      |     |
| Ce_DRH-1a | 370  | HTDILQSDNVPTRNMQSKDLIVATPQMIVNLCEHRDLKDEES                           | --- | RLDQFLSTFTIIFDFECHNT           | ---                     | KNPSY                                                   | 452                                      |     |
| Cbr_DRH-1 | 393  | HQIVQGADNIPVRAIAIKSKDLIVATPQMIVNLCEHRDLKDEES                         | --- | RLDQFLSTFTIIFDFECHNT           | ---                     | KNPSY                                                   | 477                                      |     |
| Cla_DRH-1 | 371  | HQIVQGADNIPVRSIAIQSKDLIVATPQMIVNLCEHRDLKMAE                          | --- | GVEQFLSTFTIIFDFECHNT           | ---                     | LKSPYA                                                  | 453                                      |     |
| Cre_DRH-1 | 370  | HQIVQGADNIPVRSIAIQSKDLIVATPQMIVNLCEHRDLKMAE                          | --- | GVEQFLSTFTIIFDFECHNT           | ---                     | LKSPYA                                                  | 452                                      |     |
| Cbg_DRH-1 | 371  | HQIVQGADNIPVRAIAIQSKDLIVATPQMIVNLCEHRDLKTE                           | --- | NEIGIEQFLSTFTIIFDFECHNT        | ---                     | KNPTPYACEPTIPVIMNFSDIMREYHTLK                           | 470                                      |     |
| Cni_DRH-1 | 374  | HQIVQGADNIPVRSIAIQSKDLIVATPQMIVNLCEHRDLKTE                           | --- | NEIGIEQFLSTFTIIFDFECHNT        | ---                     | KNPTPY                                                  | 458                                      |     |
| Ce_DRH-1a | 453  | MGNMPEGHSIPQIIGLTASLTGDKNCLDQVRYNIAGLCASMDVKLSLVKDLNLEELRGYSPVDPKVL  | --- | CLERS                          | ---                     | FDGPGMFTNRLTLMOVEGLTRT                                  | 552                                      |     |
| Cbr_DRH-1 | 478  | MGNMPEHHLPOIIGLTASLTGDKGNLGVKDIASLCAIMDKVLSLVKDLNLEELRGYSPVDPKVL     | --- | CLERS                          | ---                     | FDGPGMFTNRLTLMOVEGLTRT                                  | 577                                      |     |
| Cla_DRH-1 | 454  | MGNMPEGHHLPQIIGLTASLTGDKGNLGVKEHIASLCAIMDKVLSLVKDLNLEELRGYSPVDPKVL   | --- | CLERS                          | ---                     | FDGPGMFTNRLTLMOVEGLTRT                                  | 553                                      |     |
| Cre_DRH-1 | 453  | MGNMPEGHHLPQIIGLTASLTGDKGNLGVKEHIASLCAIMDKVLSLVKDLNLEELRGYSPVDPKVL   | --- | CLERS                          | ---                     | FDGPGMFTNRLTLMOVEGLTRT                                  | 552                                      |     |
| Cbg_DRH-1 | 471  | MGNMPEGHHLPQIIGLTASLTGDKGNLGVKEHIASLCAIMDKVLSLVKDLNLEELRGYSPVDPKVL   | --- | CLERS                          | ---                     | FDGPGMFTNRLTLMOVEGLTRT                                  | 548                                      |     |
| Cni_DRH-1 | 459  | MGNMPEGHHLPQIIGLTASLTGDKGNLGVKEHIASLCAIMDKVLSLVKDLNLEELRGYSPVDPKVL   | --- | CLERS                          | ---                     | FDGPGMFTNRLTLMOVEGLTRT                                  | 558                                      |     |
| Ce_DRH-1a | 553  | ALRNEHTIEQRRLDLETT                                                   | --- | ERDFRP                         | ---                     | DSSFLDPADKEHAGYVNWVCQMLVSGTSTR                          | 678                                      |     |
| Cbr_DRH-1 | 578  | ALVNEHTIODEGQIQPR                                                    | --- | FDREYAP                        | ---                     | TNTFLTAPDEKHEGSLNWCQMLVSGTSTR                           | 645                                      |     |
| Cla_DRH-1 | 554  | ALAQEHTIYDQDQGRPT                                                    | --- | DDRF                           | ---                     | FGPINEFQAPNDKEHSGYLNWCQMLVSGTSTR                        | 650                                      |     |
| Cre_DRH-1 | 553  | ALAQEHTIYDQDQGRPT                                                    | --- | DDRF                           | ---                     | FGPINEFQAPNDKEHSGYLNWCQMLVSGTSTR                        | 649                                      |     |
| Cbg_DRH-1 | 549  | SFYENITPNDVQNVQNSLFDPRPYPAENFQAPNDKEHSGYLNWCQMLVSGTSTR               | --- | AKFN                           | ---                     | RDGTIINEALEVLKCEYWTLSYNNFNPEVALRYLKS                    | 648                                      |     |
| Cni_DRH-1 | 559  | ALDQENITPNDVQNAQISLFDPRPYPAENFQAPNDKEHSGYLNWCQMLVSGTSTR              | --- | AKFN                           | ---                     | RDGTIINEALEVLKCEYWTLSYNNFNPEVALRYLKS                    | 658                                      |     |
| Ce_DRH-1a | 649  | EMEVYTPNFVWRIWIWER                                                   | --- | YHNLVITG                       | ---                     | TAQNPMITVEKKIIVQNSDQNSRSIIFVRYRYEATILNLELNKRETLERLGIKSE | 733                                      |     |
| Cbr_DRH-1 | 676  | EIEHNRARNFPEMSRIWQD                                                  | --- | YHNLVITG                       | ---                     | TAQNPMITVEKKIIVQNSDQNSRSIIFVRYRYEATILNLELNKRETLERLGIKSE | 760                                      |     |
| Cla_DRH-1 | 651  | EINLRSSNFPEMARIWDR                                                   | --- | YHNLVITG                       | ---                     | TAQNPMITVEKKIIVQNSDQNSRSIIFVRYRYEATILNLELNKRETLERLGIKSE | 735                                      |     |
| Cre_DRH-1 | 650  | EINLRSSNFPEMARIWDR                                                   | --- | YHNLVITG                       | ---                     | TAQNPMITVEKKIIVQNSDQNSRSIIFVRYRYEATILNLELNKRETLERLGIKSE | 734                                      |     |
| Cbg_DRH-1 | 649  | ELEBSANFTHTMSRIWESKFQFLLLLCIEISG                                     | --- | YHNLVITG                       | ---                     | TAQNPMITVEKKIIVQNSDQNSRSIIFVRYRYEATILNLELNKRETLERLGIKSE | 748                                      |     |
| Cni_DRH-1 | 659  | ELEBSANFTHTMSRIWESKFQFLLLLCIEISG                                     | --- | YHNLVITG                       | ---                     | TAQNPMITVEKKIIVQNSDQNSRSIIFVRYRYEATILNLELNKRETLERLGIKSE | 743                                      |     |
| Ce_DRH-1a | 734  | WISGLNKSTASSADISASKQKQMEIKMFADETRILVSTISVAEEGLDVAE                   | --- | CSLVIKY                        | ---                     | KNATNEIAHVQRRGRGRANSTCVLITNSIPLRDEGANRDK                | 833                                      |     |
| Cbr_DRH-1 | 761  | WISGLNKSTSSGSETAASQKQKREKRFANGELVSTISVAEEGLDVAE                      | --- | CSLVIKY                        | ---                     | KNATNEIAHVQRRGRGRANSTCVLITNSIPLRDEGANRDK                | 860                                      |     |
| Cla_DRH-1 | 736  | WISGLNKSTASSADISASKQKQMEIKRKFASGETRVLVATSVAAEGLDVAE                  | --- | CSLVIKY                        | ---                     | KNATNEIAHVQRRGRGRANSTCVLITNSIPLRDEGANRDK                | 835                                      |     |
| Cre_DRH-1 | 735  | WISGLNKSTASSADISASKQKQMEIKRKFASGETRVLVATSVAAEGLDVAE                  | --- | CSLVIKY                        | ---                     | KNATNEIAHVQRRGRGRANSTCVLITNSIPLRDEGANRDK                | 834                                      |     |
| Cbg_DRH-1 | 749  | WISGLNKSTSSADISASKQKQMEIKRKFASGETRVLVATSVAAEGLDVAE                   | --- | CSLVIKY                        | ---                     | KNATNEIAHVQRRGRGRANSTCVLITNSIPLRDEGANRDK                | 848                                      |     |
| Cni_DRH-1 | 744  | WISGLNKSTSSADISASKQKQMEIKRKFASGETRVLVATSVAAEGLDVAE                   | --- | CSLVIKY                        | ---                     | KNATNEIAHVQRRGRGRANSTCVLITNSIPLRDEGANRDK                | 843                                      |     |
| Ce_DRH-1a | 834  | ESLWSETISLTONSPAERKCVDESNKIPRILREDDTKAOKTEQINRNLVYKILCKKCEVFLCTN     | --- | DIRARNTQYLCRPEFWSLVKRVKVELSPAD | ---                     | 933                                                     |                                          |     |
| Cbr_DRH-1 | 861  | ENMNDALLKIQSNPFAFRDAVIAEASNIWNRI                                     | --- | REDTERAQIAEQIS                 | ---                     | RNTYRILVCKKCEVFLCTNDIRARNTQYLCRPEFWSLVKRVKVELSPAD       | 958                                      |     |
| Cla_DRH-1 | 836  | ENMNDALLKIQSNPFAFRDAVIAEASNIWNRI                                     | --- | REDTERAQIAEQIS                 | ---                     | RNTYRILVCKKCEVFLCTNDIRARNTQYLCRPEFWSLVKRVKVELSPAD       | 933                                      |     |
| Cre_DRH-1 | 835  | ENMNDALLKIQSNPFAFRDAVIAEASNIWNRI                                     | --- | REDTERAQIAEQIS                 | ---                     | RNTYRILVCKKCEVFLCTNDIRARNTQYLCRPEFWSLVKRVKVELSPAD       | 932                                      |     |
| Cbg_DRH-1 | 849  | ENMNDALLKIQSNPFAFRDAVIAEASNIWNRI                                     | --- | REDTERAQIAEQIS                 | ---                     | RNTYRILVCKKCEVFLCTNDIRARNTQYLCRPEFWSLVKRVKVELSPAD       | 948                                      |     |
| Cni_DRH-1 | 844  | ENMNDALLKIQSNPFAFRDAVIAEASNIWNRI                                     | --- | REDTERAQIAEQIS                 | ---                     | RNTYRILVCKKCEVFLCTNDIRARNTQYLCRPEFWSLVKRVKVELSPAD       | 943                                      |     |
| Ce_DRH-1a | 934  | LKIYNATG                                                             | --- | INC                            | ---                     | RENCGLKGLIEVNTVLPCLSAEITVL                              | 1010                                     |     |
| Cbr_DRH-1 | 959  | VDRSHSTGRLYFOLLRCGANGCATTGLRLDINSVELPCLGAEGMFFELIRLYYHVEYSYRHRORWRGK | --- | SNQEMENG                       | ---                     | ILHFFTPVLRQLDQIKM                                       | 1057                                     |     |
| Cla_DRH-1 | 934  | ADRCSTGK                                                             | --- | VKCL                           | ---                     | GRNGCATTGLRLDINSVELPCLSAEITVL                           | 1011                                     |     |
| Cre_DRH-1 | 933  | ADRCSTGK                                                             | --- | VKCL                           | ---                     | GRNGCATTGLRLDINSVELPCLSAEITVL                           | 1010                                     |     |
| Cbg_DRH-1 | 949  | TNKFHSTG                                                             | --- | EKCL                           | ---                     | GTNGCATTGLRLDINSVELPCLSAEITVL                           | 1032                                     |     |
| Cni_DRH-1 | 944  | RNKFHSTG                                                             | --- | EKCL                           | ---                     | GTNGCATTGLRLDINSVELPCLSAEITVL                           | 1020                                     |     |
| Ce_DRH-1a | 1011 | RDADQARITPMVFEHFRANGVVALIREA                                         | --- | 1037                           | ---                     | 1037                                                    |                                          |     |
| Cbr_DRH-1 | 1058 | RDASDNRAPINFEVHNGVIQINRDA                                            | --- | 1084                           | ---                     | 1084                                                    |                                          |     |
| Cla_DRH-1 | 1012 | RDADQARASLNFEHFRANGIENINREI                                          | --- | 1038                           | ---                     | 1038                                                    |                                          |     |
| Cre_DRH-1 | 1011 | RDADQARASLNFEHFRANGIENINREI                                          | --- | 1037                           | ---                     | 1037                                                    |                                          |     |
| Cbg_DRH-1 | 1033 | RDANQTRITPFLNFEINNGELQNIITREA                                        | --- | 1059                           | ---                     | 1059                                                    |                                          |     |
| Cni_DRH-1 | 1021 | RDANQTRITVFNFEINNGELQNIITREI                                         | --- | 1047                           | ---                     | 1047                                                    |                                          |     |

**Figure S2.** Multiple alignment of DRH-1 sequences of six *Caenorhabditis* species. The accession numbers of DRH-1 sequences are NP\_501018 (*C. elegans*, Ce), EGT53499 (*C. brenneri*, Cbr), OZG19204 (*C. latens*, Cla), XP\_003096885 (*C. remanei*, Cre), CAP25885 (*C. briggsae*, Cbg), and PIC33712 (*C. nigoni*, Cni), respectively. Identical residues are shown by red boxes.
